# Supplementary material
Source: PubMed Central journal article supplement (PMC5370566)
Supplement: NIHMS842218-supplement-Figure_1.pdf [file NIHMS842218-supplement-Figure_1.pdf]

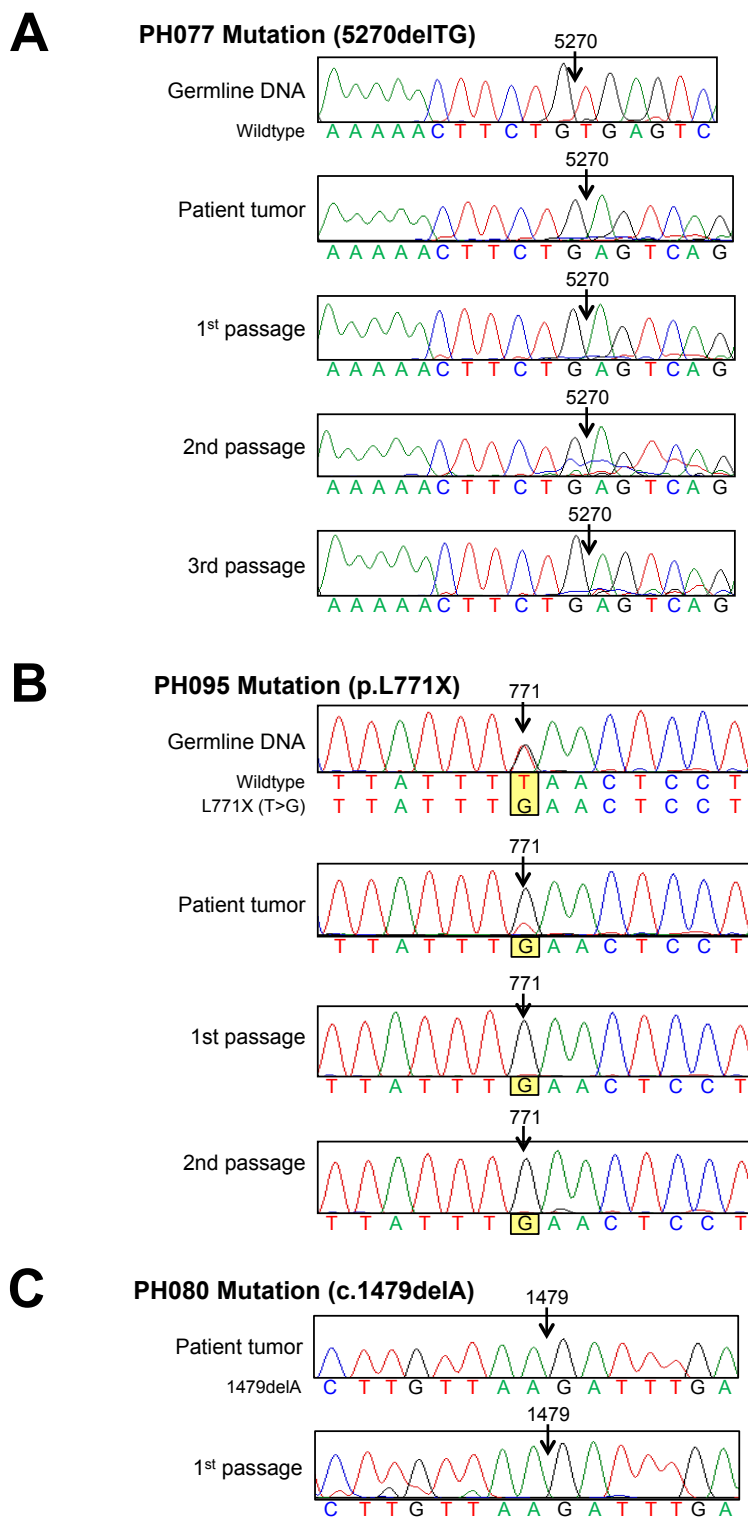

**Figure S1. Sanger sequencing.** **A**, chromatograms showing genotype of PH077 with somatic *BRCA2* mutation (5270delITG) in patient tumor, and 1<sup>st</sup>-3<sup>rd</sup> passages. Wildtype allele is absent from the PDX passages. **B**, PH095 genotype with germline nonsense mutation in *BRCA2* gene (p.L771X) and T>G base substitution. Loss of wildtype allele is seen in PDX. Patient tumor demonstrates partial presence of wildtype allele likely secondary to presence of normal stromal components within tumor. **C**, *CDK12* mutation in PH080 with frameshift mutation in second exon of *CDK12* (c.1479delA). Wildtype allele is absent from this PDX.
