# Supplementary material
Source: PubMed Central journal article supplement (PMC5370566)
Supplement: NIHMS842218-supplement-Figure_2.pdf [file NIHMS842218-supplement-Figure_2.pdf]

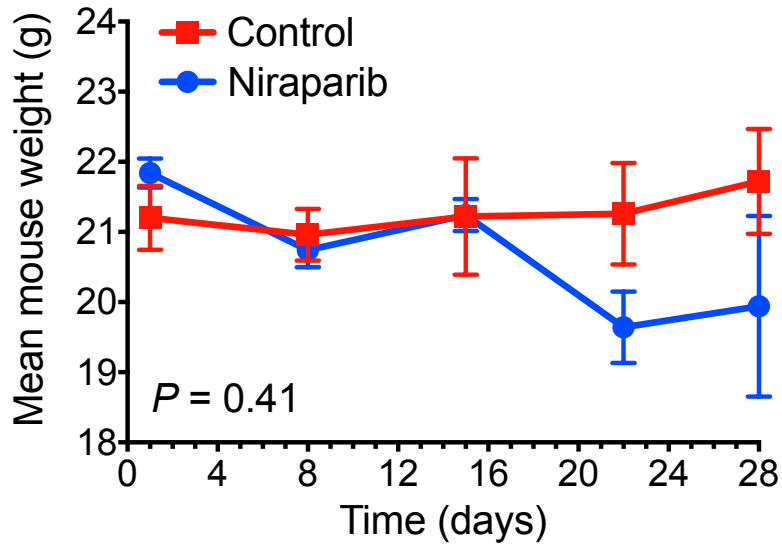

**Figure S2. Mean body weight in treatment and control groups.** Animals bearing PH077 were weighed once weekly during treatment with niraparib 100 mg/kg/d. No significant difference was seen between the two groups. Similar results were observed with mice bearing the other PDX models.
